# Predictors of pre-procedural concentrations of direct oral anticoagulants: a prospective multicentre study

Anne Godier<sup>1,2\*</sup>, Anne-Sophie Dincq<sup>3</sup>, Anne-Céline Martin<sup>2,4</sup>, Adrian Radu<sup>5</sup>, Isabelle Leblanc<sup>6</sup>, Marion Antona<sup>7</sup>, Marc Vasse<sup>8,9</sup>, Jean-Louis Golmard<sup>10</sup>, François Mullier<sup>11</sup>, and Isabelle Guoin-Thibault<sup>2,12,13</sup>

<sup>1</sup>Fondation Adolphe de Rothschild, Service d'Anesthésie-Réanimation, 25 rue Manin, 75019, Paris, France; <sup>2</sup>Inserm UMR-S1140, Faculté de Pharmacie, Université Paris Descartes, 4, avenue de l'Observatoire, 75006 Paris, France; <sup>3</sup>Université catholique de Louvain, CHU UCL Namur, Namur Thrombosis and Haemostasis Center, Department of Anesthesiology, Avenue du Docteur Gaston Thérèse, 1, 5530 Yvoir, Belgium; <sup>4</sup>Hôpital d'Instruction des Armées Percy, Service de Cardiologie, 101 Avenue Henri Barbusse, 92140 Clamart, France; <sup>5</sup>Hôpital Foch, Service d'Anesthésie, 40 Rue Worth, 92150 Suresnes, France; <sup>6</sup>Institut Mutualiste Montsouris, Service d'Anesthésie, 42 boulevard Jourdan, 75014 Paris, France; <sup>7</sup>AP-HP, Hôpital Cochin, Service d'Anesthésie-Réanimation, 27 rue du Faubourg-Saint-Jacques, 75014 Paris, France; <sup>8</sup>Hôpital Foch, Service de Biologie Clinique, 40 Rue Worth, 92150 Suresnes; <sup>9</sup>INSERM UMR-S1176, Université Paris-Sud, 80 rue du Général Leclerc, 94276 Le Kremlin-Bicêtre, France; <sup>10</sup>AP-HP, GH Pitié-Salpêtrière, Département de biostatistiques, 47-83 boulevard de l'Hôpital, 75013 Paris, France; <sup>11</sup>Université catholique de Louvain, CHU UCL Namur, Namur Thrombosis and Haemostasis Center, Hematology Laboratory, Avenue du Docteur Gaston Thérèse, 1, 5530 Yvoir, Belgium; <sup>12</sup>AP-HP, Hôpital Cochin, Laboratoire d'hématologie, 27 rue du Faubourg-Saint-Jacques, 75014 Paris, France; and <sup>13</sup>Hôpital Pontchaillou, Laboratoire d'Hématologie, 2 Rue Henri le Guilloux, 35000 Rennes, France

Received 11 November 2016; revised 23 June 2017; editorial 23 June 2017; accepted 29 June 2017; online publish-ahead-of-print 24 July 2017

See page 2440 for the editorial comment on this article (doi: 10.1093/eurheartj/ehx416)

## Aims

Patients receiving direct oral anticoagulants (DOACs) frequently undergo elective invasive procedures. Their management is challenging. We aimed to determine the optimal duration of DOAC discontinuation that ensures a minimal anticoagulant effect during the procedure.

## Methods and results

This prospective multicentre study included 422 DOAC-treated patients requiring an invasive procedure. Pre-procedural DOAC concentration ([DOAC]) and routine haemostasis assays were performed to determine i/the proportion of patients who achieved a minimal pre-procedural [DOAC] ( $\leq 30$  ng/mL) according to the duration of DOAC discontinuation, ii/the predictors of minimal [DOAC] and, iii/the ability of routine assays to predict minimal [DOAC]. Lastly, we assessed the predictors of peri-procedural bleeding events. The duration of DOAC discontinuation ranged from 1 to 218 h and pre-procedural [DOAC] from  $\leq 30$  to 527 ng/mL. After a 49–72-h discontinuation, 95% of the [DOAC] were  $\leq 30$  ng/mL. A 72-h discontinuation predicted concentrations  $\leq 30$  ng/mL with 91% specificity. In multivariable analysis, duration of DOAC discontinuation, creatinine clearance  $< 50$  mL/min and antiarrhythmics were independent predictors of minimal pre-procedural [DOAC] (concordance statistic 0.869; 95% confidence interval: 0.829–0.912). Conversely, routine haemostasis assays were poor predictors. Last, creatinine clearance  $< 50$  mL/min, antiplatelets and high-bleeding risk procedures were predictors of bleeding events.

## Conclusion

A last DOAC intake 3 days before a procedure resulted in minimal pre-procedural anticoagulant effect for almost all patients. Moderate renal impairment, especially in dabigatran-treated patients, and antiarrhythmics in anti-Xa-treated patients should result in a longer DOAC interruption. In situations requiring testing, routine assays should not replace DOAC concentration measurement.

## Keywords

Direct oral anticoagulant • Invasive procedure • Renal • Antiarrhythmic • Blood coagulation tests • Bleeding

\* Corresponding author. Tel: +33 1 48 03 67 76, Fax: +33 1 48 03 65 11, Email: [agodier@fo-rothschild.fr](mailto:agodier@fo-rothschild.fr)

Published on behalf of the European Society of Cardiology. All rights reserved. © The Author 2017. For permissions, please email: [journals.permissions@oup.com](mailto:journals.permissions@oup.com).

## Introduction

Direct oral anticoagulants (DOACs), which include dabigatran, rivaroxaban, apixaban, and edoxaban, are authorized for prevention and treatment of venous thromboembolism (VTE) and recommended in first intention for stroke prevention in patients with non-valvular atrial fibrillation (NVAF).<sup>1</sup> Each year, approximately 1 in 10 DOAC-treated patients requires a planned invasive procedure.<sup>2,3</sup> However, the pre-procedural management of DOACs is a complex challenge and the optimal duration of DOAC discontinuation remains uncertain.

Temporary interruption of DOACs is typically individualized according to the procedure-associated bleeding risk. Low-bleeding risk procedures can be safely undertaken while a patient is on DOAC or after a 24-h discontinuation. High-bleeding risk procedures require temporary discontinuation to ensure a minimal anticoagulant effect at the time of surgery, i.e. compatible with procedural management without increasing the bleeding risk. For these high-bleeding risk procedures, the duration of DOAC discontinuation proposed in current publications and practical guidelines is based on pharmacokinetic approaches and predicted by the elimination half-life, which is strongly influenced by renal function in DOACs with predominant renal excretion. However, these proposals provide a wide range of recommendations regarding the optimal duration of DOAC discontinuation before a high-bleeding risk procedure, from 2 to 7 days for dabigatran and from 2 to 5 days for apixaban or rivaroxaban.<sup>4-7</sup> In a previous pilot study, we reported that a 2-day discontinuation does not guarantee a minimal anticoagulant effect at the time of surgery.<sup>8</sup>

The CONcentration of Rivaroxaban, Dabigatran and Apixaban (CORIDA) study was designed to address a simple question: what is the optimal duration of DOAC discontinuation to ensure a minimal anticoagulant effect at the time of a planned invasive procedure? To answer this question, we performed a multicentre prospective observational study which included a large number of dabigatran-, apixaban-, or rivaroxaban-treated patients slated for an invasive procedure irrespective of their duration of DOAC discontinuation. In these patients, we investigated the factors, and specifically the duration of DOAC discontinuation, influencing pre-procedural DOAC concentrations. In addition, we evaluated the ability of routine haemostasis assays to predict minimal anticoagulant effect. Lastly, we assessed the factors associated with peri-procedural bleeding events.

## Methods

The CORIDA study was a multicentre, prospective, observational study conducted from June 2013 to December 2015 in six centres in France and Belgium (Fondation Rothschild, Hôpital Cochin, Hôpital du Val-de-Grâce, Hôpital Foch, Institut Mutualiste Montsouris and CHU UCL Namur). The study was approved by the research ethics boards (Comité de Protection des Personnes Ile de France 1, ref. 2013-13272 and Comité interne CHU UCL NAMUR 09/2014, ref. B039201422406). All patients were informed before inclusion and the physician in charge of the patient signed the non-opposition form (the research ethics board waived the need for patient signatures on informed consent forms since this was an observational study). This study was registered at ClinicalTrials.gov, number NCT02643992.

## Patients and study design

The methodology was described in detail in a previous pilot study.<sup>8</sup> In each participating centre, the physicians in charge of the study prospectively enrolled consecutive patients who were taking dabigatran, apixaban, or rivaroxaban for NVAF or VTE treatment and required any invasive procedure. Invasive procedure was defined as any elective or urgent surgery, endoscopy, and cardiac catheterization. Urgent procedure was defined as a procedure required within 48 h. Patients were managed according to local practice and the study had no impact on procedures. For the study, patients had one blood sample taken in the operating room just before the beginning of the invasive procedure (pre-procedural blood sampling). Blood was collected into 109 mM citrate tubes and was centrifuged within 2 h to obtain plasma for coagulation testing.

## Coagulation testing

Coagulation testing included DOAC concentration measurement and routine haemostasis assays, namely prothrombin time (PT), activated partial thromboplastin time (aPTT), thrombin time (TT) (in plasma of dabigatran-treated patients), and low-molecular-weight heparin (LMWH) anti-Xa activity (in plasma of apixaban and rivaroxaban-treated patients) (details presented in the Supplementary material online).

## Data collection

For each patient, demographic, clinical, and biological data were collected: age, gender, weight, history of stroke, and creatinine clearance calculated using the Cockcroft and Gault formula (moderate and severe renal impairments were defined as clearance lower than 50 and 30 mL/min, respectively). Relevant comedications were also recorded. They included P-glycoprotein and/or CYP 3A4 inhibitors that interact with DOAC metabolism and potentially increase DOAC concentrations, including antiarrhythmic drugs such as amiodarone, dronedarone, verapamil, diltiazem and quinidine, and antifungal agents;<sup>3</sup> proton-pump inhibitors that decrease the gastro-intestinal absorption of dabigatran and non-steroidal anti-inflammatory drugs and antiplatelet agents, which could potentiate the bleeding risk.<sup>3</sup>

The following characteristics of peri-procedural DOAC management were recorded: DOAC type and indication, duration of discontinuation, use of pre-procedural and/or post-procedural bridging (LMWH or unfractionated heparin), and finally coagulation test results at the beginning of the procedure. The duration of DOAC discontinuation was recorded as the exact time from the last drug intake to the invasive procedure and classified according to predefined 24-h intervals.

Pre-procedural DOAC concentrations were interpreted according to different thresholds: 30, 50, 100, and 200 ng/mL. First, 30 ng/mL was selected since it is the safety haemostatic threshold proposed for high-bleeding risk surgery by the subcommittee on control of anticoagulation of the ISTH and the French Working Group on perioperative haemostasis (GIHP).<sup>9,10</sup> We then considered the 50 ng/mL threshold proposed by the subcommittee on control of anticoagulation in patients with serious bleeding since concentrations below this threshold might not exacerbate ongoing haemorrhage.<sup>9</sup> We also chose 100 ng/mL which has been proposed as the maximal cut-off for the use of intravenous thrombolysis in rivaroxaban treated-patients with stroke.<sup>11,12</sup> Lastly, we selected 200 ng/mL which has been described as a DOAC concentration associated with a consistent peri-procedural bleeding risk.<sup>10</sup>

The types, dates, and outcomes of the invasive procedures were noted (details presented in the Supplementary material online).

## Statistical analysis

The study sample size was estimated to test the hypothesis that creatinine clearance would be a predictive factor of pre-procedural DOAC

concentration  $\leq 30$  ng/mL. Calculations were based on data from our pilot study: observed creatinine clearances were  $75 \pm 25$  mL/min and  $83 \pm 33$  mL/min in patients with pre-procedural DOAC concentrations below and over 30 ng/mL, respectively, and the sample size ratio between the two groups was 1.4.<sup>8</sup> Using a test with a first order risk of 0.05, the total number of subjects needed to reach a 0.80 power is 417.

Descriptive statistics used median (minimum–maximum) for quantitative variables and numbers (percentages) for qualitative ones. A non-parametric regression curve of the DOAC concentration value vs. duration of DOAC discontinuation was estimated by the loess method. In order to define the best duration of DOAC discontinuation, we constructed a receiver operating characteristic (ROC) curve relating duration of DOAC discontinuation with DOAC concentrations  $\leq 30$  ng/mL at the time of the invasive procedure. The best duration was defined as the minimum duration with a specificity higher than 90% in order to optimize the proportion of false positive i.e. patients with DOAC concentrations  $>30$  ng/mL wrongly predicted to be  $\leq 30$  ng/mL. We used Wilcoxon tests for quantitative variables and  $\chi^2$  tests or Fisher's exact tests for qualitative variables to compare groups of individuals with DOAC concentrations  $\leq 30$  ng/mL and individuals with DOAC concentrations  $>30$  ng/mL. Among factors associated with concentrations  $\leq 30$  ng/mL, the quantitative variables tested were age, weight, duration of DOAC discontinuation whereas the qualitative variables were gender, creatinine clearance lower than 50 mL/min, DOAC type and indication, history of stroke, concomitant intake of interfering drugs, pre-procedural bridging, procedure-associated bleeding risk, and elective characteristics. In a second step, a stepwise logistic regression was performed to predict DOAC concentrations  $\leq 30$  ng/mL. Variables entered in the stepwise regression had a *P*-value lower than 0.10 in the univariate analysis whereas variables retained in the final model had a *P*-value lower than 0.05 by the Wald test. The performance of the predictive model was assessed by both the concordance statistic (area under the ROC curve) and the optimism-corrected value of Harrell's concordance statistic. Similar comparisons were performed for the threshold of 50 ng/mL.

Comparisons of groups of individuals with bleeding events and individuals without bleeding events were performed using Student's *t*-tests. Among factors associated with bleeding events, the quantitative variables tested were age, weight, duration of DOAC discontinuation, and pre-procedural DOAC concentration and the qualitative variables were gender, creatinine clearance lower than 50 mL/min, DOAC type and indication, history of stroke, concomitant intake of interfering drugs, pre-procedural bridging, procedure-associated bleeding risk, and elective characteristics. In a second step, a stepwise logistic regression was performed in order to predict bleeding events. Variables entered in the stepwise regression had a *P*-value lower than 0.10 in the univariate analysis whereas the variables retained in the final model had a *P*-value lower than 0.05 by the Wald test. The effect of an antiarrhythmic drug, defined as administration of either amiodarone or verapamil or diltiazem, was analysed as well as the effect of each antiarrhythmic drug.

In order to evaluate the ability of the combination of a normal PT and a normal aPTT to predict minimal pre-procedural DOAC concentrations, we determined the sensitivity, specificity, positive predictive value (PPV), and negative predictive value (NPV) of the combination of a normal PT and a normal aPTT to predict a concentration  $\leq 30$  ng/mL. Thus, PPV is the probability that patients with a combination of a normal PT and a normal aPTT have a concentration  $\leq 30$  ng/mL whereas NPV is the probability that patients with a PT and/or an aPTT above the normal value do not have concentration  $\leq 30$  ng/mL. We also evaluated the ability of a normal TT and the ability of LMWH anti-Xa activity  $\leq 0.1$  IU/mL to predict a concentration  $\leq 30$  ng/mL. The 95% confidence intervals (CIs) of

the sensitivity, specificity, PPV and NPV have been computed using the Agresti–Coull method.

All tests were two-sided, with a *P*-value of 0.05 considered as significant. The computations were performed using the SAS V9.3 statistical package (SAS Institute Inc., Cary, NC, USA).

## Results

### Patient characteristics

Between June 2013 and December 2015, 422 DOAC-treated patients slated for invasive procedures were included in the study. Their characteristics are shown in the Supplementary material online. More than half of the patients were treated with rivaroxaban (55%), followed by dabigatran (31%) and apixaban (14%). Non-valvular atrial fibrillation was the most common indication for DOAC therapy (95%). One-fourth of the patients had a history of stroke and 14% of the patients had a creatinine clearance lower than 50 mL/min. Fifty-nine percent of the procedures were classified as having a high-bleeding risk and 92% were elective procedures.

### Pre-procedural direct oral anticoagulant management

The median duration of DOAC discontinuation was 66 h (range: 1–218 h). Pre-procedural bridging was performed in 35% of the patients scheduled for elective procedures.

### Pre-procedural direct oral anticoagulant concentrations and duration of direct oral anticoagulant discontinuation

Direct oral anticoagulant concentrations measured at the time of the invasive procedure ranged from  $\leq 30$  to 527 ng/mL; 77% of the measurements were  $\leq 30$  ng/mL and 86% of the measurements were  $\leq 50$  ng/mL. The relationship between duration of DOAC discontinuation and concentrations is illustrated in *Figure 1*.

The proportion of patients with pre-procedural DOAC concentrations below the four pre-defined thresholds according to the duration of DOAC discontinuation is illustrated in *Figure 2*. As expected, more concentrations were  $\leq 30$  ng/mL after 48-h discontinuation than after a shorter period (*P* = 0.0001). Indeed, a 25 to 48-h discontinuation resulted in 38% of the DOAC concentrations  $>30$  ng/mL and 7% of the measurements remained  $>100$  ng/mL. On the contrary, after a 49 to 72-h discontinuation, only 5% of the DOAC concentrations remained  $>30$  ng/mL and none was  $>50$  ng/mL.

The ROC curve analysis (*Figure 3*) demonstrated that 54 h was the best duration of DOAC discontinuation to predict a DOAC concentration  $\leq 30$  ng/mL with a specificity of 91% (95% CI: 85–97) and a sensitivity of 68% (95% CI: 63–73). The PPV of the 54-h discontinuation was 96% (95% CI: 93–99). A last intake 54 h before an invasive procedure cannot be easily applied in clinical practice but this exact duration is included in the predefined interval of 49–72 h with the following performances: a 49-h discontinuation has a specificity of 89% (95% CI: 83–95) which is less accurate than a 54-h discontinuation, and a sensitivity of 72% (95% CI: 67–77). A 72-h discontinuation has a specificity of 91% (95% CI: 85–97), similar to a 54-h discontinuation, and a sensitivity of 60% (95% CI: 55–66).

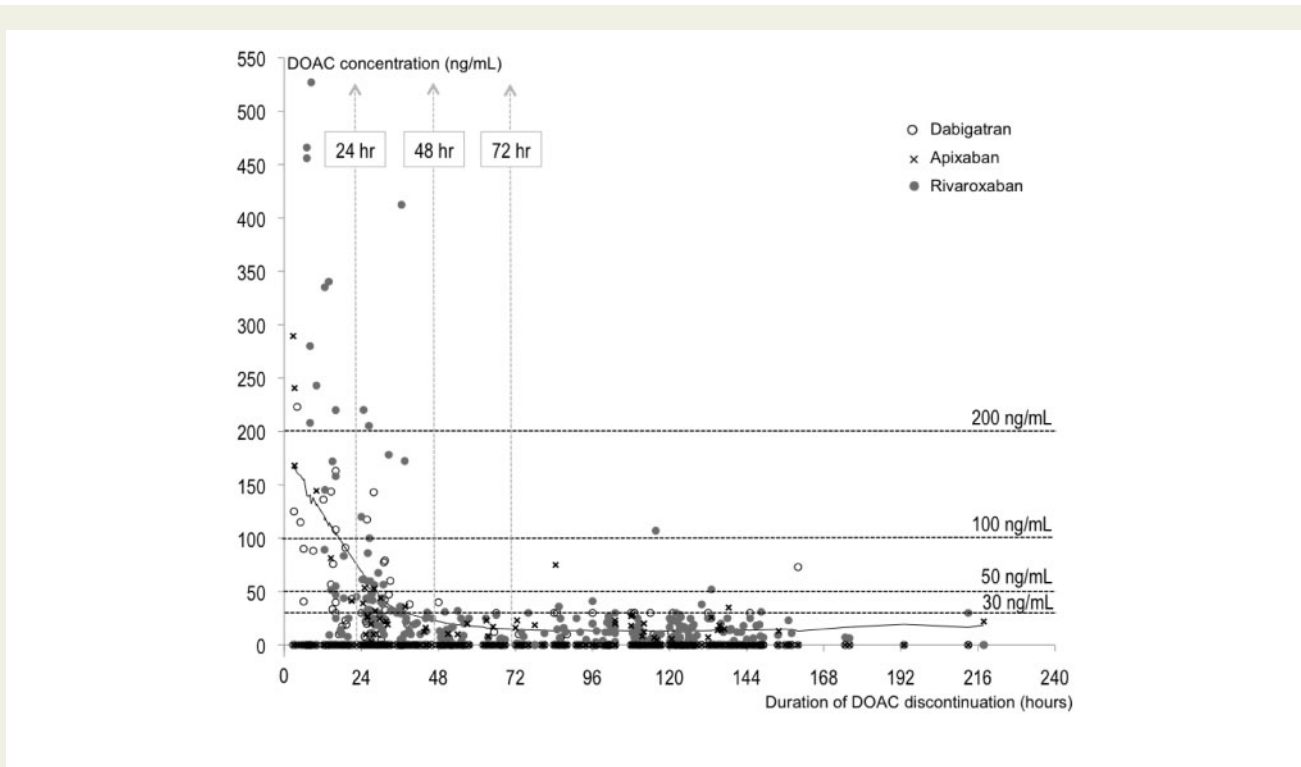

**Figure 1** Fit plot of DOAC concentrations measured at the time of invasive procedure according to the duration of DOAC discontinuation. DOAC, direct oral anticoagulant.

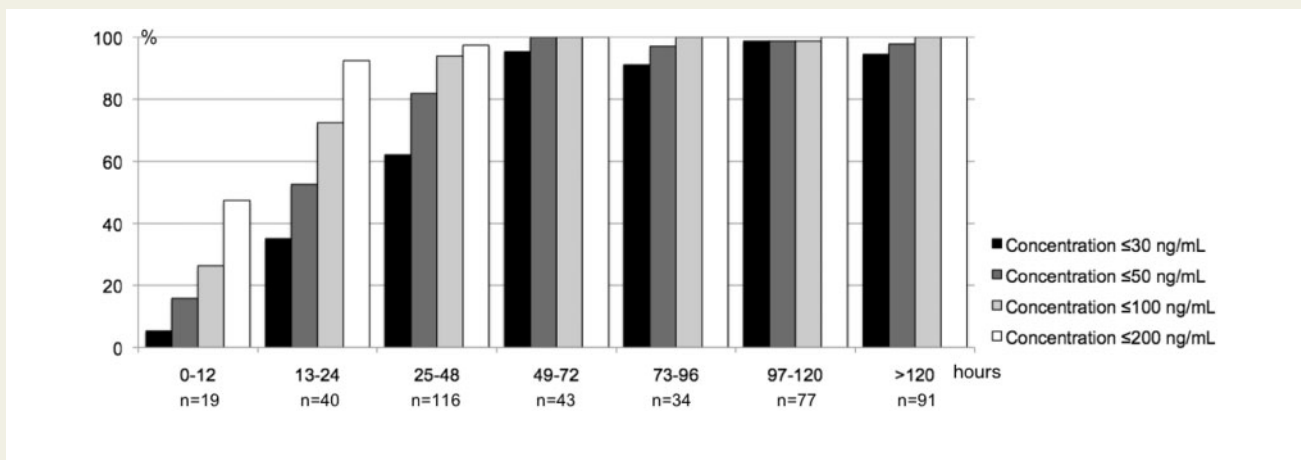

**Figure 2** Proportion of patients with DOAC concentrations below various threshold values (30; 50; 100, and 200 ng/mL) at the time of the invasive procedure according to the duration of DOAC discontinuation. n: the number of patients with measured concentrations by duration of DOAC discontinuation. Each patient had a single blood sample taken in the operating room just before the beginning of the invasive procedure.

### Factors associated with minimal pre-procedural direct oral anticoagulant concentrations

Multivariable analysis highlighted four independent predictors of DOAC concentration  $\leq 30$  ng/mL (Table 1): duration of DOAC

discontinuation was highly associated with DOAC concentration  $\leq 30$  ng/mL, whereas creatinine clearance  $< 50$  mL/min, antiarrhythmic treatment and pre-procedural bridging were negatively associated with DOAC concentration  $\leq 30$  ng/mL. In contrast, the type of DOAC treatment was not associated with a

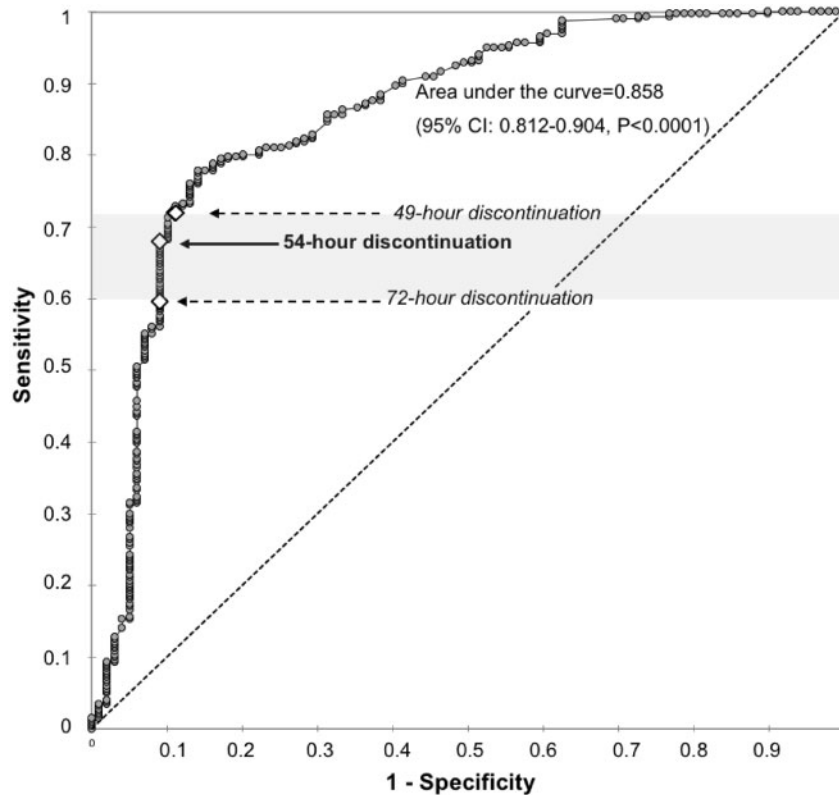

**Figure 3** Receiver operating characteristic (ROC) curve relating duration of DOAC discontinuation with DOAC concentrations  $\leq 30$  ng/mL at the time of the invasive procedure. The diagonal line represents a hypothetical ROC curve from a test that yielded no diagnostic information. The bold arrow shows that a 54-h discontinuation is the shorter duration of DOAC discontinuation with a specificity higher than 90%. The dotted arrows show performance of the 49 to 72-h interval.

concentration  $\leq 30$  ng/mL. Noteworthy, when performing the multi-variable logistic analysis without any variable selection, the results remained unchanged. Regarding performance of the predictive model, the concordance statistic was 0.869 (95% CI: 0.829–0.912,  $P < 0.0001$ ; ROC curve in the Supplementary material online) and the optimism-corrected value of Harrell's concordance statistic was 0.849. When each antiarrhythmic drug was analysed separately, both amiodarone and verapamil were independent predictors of DOAC concentration  $\leq 30$  ng/mL [odds ratio (OR) 0.351; 95% CI 0.180–0.683;  $P = 0.0021$  and OR 0.094; 95% CI 0.011–0.809;  $P = 0.0313$ , respectively].

When focusing on patients who stopped DOACs within 48 h before the invasive procedure, the independent predictors of DOAC concentration  $\leq 30$  ng/mL remained the duration of DOAC discontinuation (OR 8.991; 95% CI 3.499–23.102;  $P < 0.0001$ ), creatinine clearance  $< 50$  mL/min (OR 0.264; 95% CI 0.105–0.664;  $P = 0.0046$ ), and antiarrhythmic treatment (OR 0.299; 95% CI 0.131–0.679;  $P = 0.0039$ ).

Direct oral anticoagulants were also separately assessed. For dabigatran, the duration of DOAC discontinuation (OR 3.066; 95% CI 1.688–5.568;  $P = 0.0002$ ) and creatinine clearance  $< 50$  mL/min (OR 0.212; 95% CI 0.052–0.855;  $P = 0.0292$ ) were independent predictors

of concentration  $\leq 30$  ng/mL. For rivaroxaban, the duration of DOAC discontinuation (OR 6.302; 95% CI 3.213–12.360;  $P \leq 0.0001$ ), antiarrhythmic treatment (OR 0.375; 95% CI 0.148–0.947;  $P = 0.0379$ ) and bridging (OR 0.03; 95% CI 0.004–0.248;  $P = 0.0012$ ) were independent predictors of concentration  $\leq 30$  ng/mL whereas for apixaban, only the duration of DOAC discontinuation (OR 3.293; 95% CI 1.461–7.424;  $P = 0.0041$ ) and antiarrhythmic treatment (OR 0.038; 95% CI 0.003–0.467;  $P = 0.0105$ ) were independent predictors of concentration  $\leq 30$  ng/mL.

Moreover, the independent predictors of DOAC concentration  $\leq 50$  ng/mL in multivariable analysis performed in the overall population were the same as for the 30 ng/mL threshold (details presented in the Supplementary material online).

### The ability of routine haemostasis assays to predict minimal pre-procedural direct oral anticoagulant concentrations

The combination of a normal PT and a normal aPTT measured at the same time as pre-procedural DOAC concentrations had good PPV (92%) and good specificity (81%) but limited NPV (45%) and sensitivity (69%) to predict a concentration  $\leq 30$  ng/mL in the overall population.



**Table 1** Univariate and multivariable analyses of predictors of direct oral anticoagulant concentrations  $\leq 30$  ng/mL

| Variable                            | $\leq 30$ ng/mL<br>n = 323 | $>30$ ng/mL<br>n = 99   | P-value,<br>univariate<br>analysis | OR (95% CI)            | P-value,<br>multivariable<br>analysis |
|-------------------------------------|----------------------------|-------------------------|------------------------------------|------------------------|---------------------------------------|
| Age, years                          | 74 [40–96]                 | 75 [44–95]              | 0.3060                             |                        |                                       |
| Male, %                             | 187 (58)                   | 49 (49)                 | 0.1408                             |                        |                                       |
| Weight, kg                          | 80 [43–185]                | 78 [40–165]             | 0.3477                             |                        |                                       |
| CrCL < 50 mL/min                    | 32 (10)                    | 24 (25)                 | 0.0002                             | 0.334<br>(0.160–0.695) | 0.0034                                |
| NVAF/VTE                            | 302 (94)/20 (6)            | 97 (98)/2 (2)           | 0.1013                             |                        |                                       |
| History of stroke                   | 73 (24)                    | 20 (23)                 | 0.8725                             |                        |                                       |
| Dabigatran/apixaban/rivaroxaban     | 102 (32)/43 (13)/178 (55)  | 29 (29)/14 (14)/56 (57) | 0.9071                             |                        |                                       |
| Antiarrhythmic drugs (A or V or D)  | 77 (24)                    | 34 (34)                 | 0.0378                             | 0.334<br>(0.174–0.640) | 0.001                                 |
| PPI                                 | 101 (31)                   | 32 (32)                 | 0.8579                             |                        |                                       |
| NSAID                               | 2 (1)                      | 1 (1)                   | 0.5526                             |                        |                                       |
| Antiplatelet agents                 | 40 (12)                    | 22 (22)                 | 0.0156                             |                        |                                       |
| Elective procedure                  | 305 (94)                   | 84 (85)                 | 0.0019                             |                        |                                       |
| High-bleeding risk                  | 225 (70)                   | 23 (23)                 | <0.0001                            |                        |                                       |
| Duration of DOAC discontinuation, h | 97 [6–218]                 | 26 [1–160]              | <0.0001                            | 4.652<br>(2.982–7.258) | <0.0001                               |
| Pre-procedural bridging             | 128 (40)                   | 10 (10)                 | 0.0001                             | 0.078<br>(0.019–0.322) | 0.0004                                |

Values are given as median [min–max] or number (percentage).

CrCL, creatinine clearance; DOAC, direct oral anticoagulant; NSAID, non-steroidal anti-inflammatory drugs; PPI, proton-pump inhibitors; NVAF, non-valvular atrial fibrillation; VTE, venous thromboembolism; (A or V or D), amiodarone or verapamil or diltiazem; OR, odds ratio; CI, confidence interval.

**Table 2** Performances of routine haemostasis assays to predict DOAC concentrations  $\leq 30$  ng/mL

| Assays                                 | DOAC                   | n   | PPV                      | Specificity              | NPV                     | Sensitivity              |
|----------------------------------------|------------------------|-----|--------------------------|--------------------------|-------------------------|--------------------------|
| Normal aPTT and normal PT              | dabigatran             | 108 | 44/46 = 96%<br>[88–100]  | 24/26 = 92%<br>[80–100]  | 24/62 = 39%<br>[27–51]  | 44/82 = 54%<br>[43–64]   |
|                                        | rivaroxaban            | 210 | 124/132 = 94%<br>[90–98] | 38/46 = 83%<br>[72–94]   | 38/78 = 49%<br>[38–60]  | 124/164 = 76%<br>[70–82] |
|                                        | apixaban               | 46  | 23/29 = 79%<br>[65–94]   | 8/14 = 57%<br>[34–80]    | 8/17 = 47%<br>[26–68]   | 23/32 = 72%<br>[57–87]   |
| LMWH anti-Xa activity $\leq 0.1$ IU/mL | rivaroxaban + apixaban | 215 | 87/87 = 100%<br>[97–100] | 54/54 = 100%<br>[95–100] | 54/128 = 42%<br>[34–51] | 87/161 = 54%<br>[46–62]  |
| Normal thrombin time                   | dabigatran             | 116 | 45/45 = 100%<br>[95–100] | 25/25 = 100%<br>[91–100] | 25/71 = 35%<br>[24–46]  | 45/91 = 49%<br>[39–60]   |

Data are presented as numerator/denominator = % and [95% CI].

DOAC, direct oral anticoagulant; LMWH, low-molecular-weight heparin; NPV, negative predictive value; PPV, positive predictive value; aPTT, activated partial thromboplastin time; PT, prothrombin time.

When focusing on patients treated with rivaroxaban or dabigatran, the PPV of this combination rose to 94% and 96%, respectively, whereas in apixaban-treated patients the PPV fell to 79% (Table 2).

Importantly, when considering only procedures performed within 48 h after DOAC discontinuation, the performance of the combination of a normal PT and a normal aPTT was poor: PPV was 80% for rivaroxaban and dabigatran-treated patients and dropped to 55% for apixaban-treated patients, with sensitivity remaining low at 58%.

Normal TT as well as LMWH anti-Xa activity  $\leq 0.1$  IU/mL were excellent to predict DOAC concentrations  $\leq 30$  ng/mL (Table 2). However, both had poor NPV.

### Peri-procedural outcome

Thirty-one patients (7%) had peri-procedural bleeding events: 12 were major bleeds (including 10 events requiring blood transfusion) and 27 occurred after the procedure. In multivariable analysis,

**Table 3** Uni- and multivariable analyses of risk factors for peri-procedural bleeding events

| Factor                                           | Patients with bleeding event<br>n = 31 | Patients without bleeding event<br>n = 391 | P-value | Multivariable odds ratio (95% CI) | P-value |
|--------------------------------------------------|----------------------------------------|--------------------------------------------|---------|-----------------------------------|---------|
| Male                                             | 22 (71)                                | 206 (55)                                   | 0.076   |                                   |         |
| CrCL < 50 mL/min                                 | 8 (27)                                 | 46 (13)                                    | 0.048   | 3.425 (1.364–8.621)               | 0.009   |
| Dabigatran/apixaban/rivaroxaban                  | 7 (23)/1 (3)/23 (74)                   | 122 (32)/55 (15)/201 (53)                  | 0.054   |                                   |         |
| Antiarrhythmic drugs (A or V or D)               | 12 (39)                                | 94 (25)                                    | 0.090   |                                   |         |
| Antiplatelet agents                              | 8 (26)                                 | 49 (13)                                    | 0.058   | 2.593 (1.004–6.696)               | 0.0491  |
| High-bleeding risk                               | 28 (90)                                | 216 (57)                                   | 0.0003  | 7.610 (2.227–26.004)              | 0.001   |
| General anaesthesia                              | 22 (71)                                | 191 (52)                                   | 0.038   |                                   |         |
| Duration of DOAC discontinuation, h, means (±SD) | 98 (47)                                | 72 (48)                                    | 0.003   |                                   |         |
| Pre-procedural bridging                          | 15 (48)                                | 121 (32)                                   | 0.063   |                                   |         |
| Post-procedural bridging                         | 20 (67)                                | 124 (33)                                   | 0.0002  |                                   |         |

The table only shows variables with a P-value lower than 0.10 in the univariate analysis. Values are given as number (percentages), unless stated otherwise. CrCL, creatinine clearance; DOAC, direct oral anticoagulant; (A or V or D), amiodarone or verapamil or diltiazem; SD, standard deviation; CI, confidence interval.

procedure-associated high-bleeding risk, antiplatelet therapy, and creatinine clearance lower than 50 mL/min were independent predictors of bleeding complications (Table 3). In contrast, pre-procedural DOAC concentration, duration of DOAC discontinuation, pre-procedural, or post-procedural bridging were not independent risk factors of bleeding events. No thromboembolic events, major cardiovascular events, or deaths were recorded.

## Discussion

In this prospective study which included a large number of patients, we found that a duration of DOAC discontinuation of 49–72 h resulted in pre-procedural DOAC concentrations  $\leq 30$  ng/mL for 95% of the patients. These data support that a last DOAC intake 3 days before an elective procedure with a high-bleeding risk is adequate to ensure a minimal pre-procedural DOAC concentration, irrespective of the DOAC or the dosing regimen (once or twice daily). The CORIDA study is the first large study to provide biological arguments to support the strategies currently proposed for the interruption of DOAC therapy before elective procedures. Indeed, these strategies are based on DOAC pharmacokinetic properties, assuming that an interruption of four to five DOAC half-lives would guarantee a minimal drug concentration compatible with a high-bleeding risk procedure.<sup>5</sup> This approach has been adopted in the three pivotal trials comparing DOACs with warfarin for NVAf and the resulting rates of major bleeding were low and similar in DOAC-treated and warfarin-treated patients.<sup>2,3,13</sup>

Our study provides evidence that renal impairment, even moderate, is an issue in the peri-operative setting, especially with dabigatran.<sup>14</sup> It supports the concept proposed by practical guidelines that dabigatran discontinuation should be based on patient renal function, with duration progressively prolonged according to creatinine clearance.<sup>5,15,16</sup> Thus, an additional 1–2 days of interruption, i.e. a total of 4 to 5 days, would ensure a minimal anticoagulant effect in patients receiving dabigatran with a clearance of 30–50 mL/min and slated for a high bleeding risk procedure.

In contrast, apixaban and rivaroxaban are less affected by renal function.<sup>16</sup> In our study, renal clearance of 30–50 mL/min was not associated to higher apixaban or rivaroxaban pre-procedural concentrations, which suggests that moderate renal impairment does not require an increased discontinuation duration for apixaban- or rivaroxaban-treated patients.

Drug–drug interactions may affect DOAC concentrations, especially concomitant use of P-glycoprotein inhibitors or CYP3A4 inhibitors.<sup>4</sup> The clinical relevance of these interactions has not been clearly defined, and has never been assessed in the perioperative setting. Our results showed that antiarrhythmic treatment was independently associated with higher DOAC pre-procedural concentrations. In particular, these drugs had a significant effect on apixaban and rivaroxaban, although this has been poorly reported.<sup>4,17</sup> In contrast, we found no effect of antiarrhythmic treatment on dabigatran although both amiodarone and verapamil are known to increase dabigatran plasma levels.<sup>4</sup> Physicians may consider adaptation of DOAC management before high-bleeding risk surgery in the presence of antiarrhythmic treatment.

The CORIDA study also assessed risk factors for peri-procedural bleeding complications and found that renal impairment was a major predictor. It is well known that patients with moderate to severe renal impairment are at increased risk of thromboembolism but also bleeding compared with patients with normal renal function.<sup>18,19</sup> However, the effect of renal impairment on peri-operative bleeding has been poorly assessed.<sup>20,21</sup> Our study demonstrated that patients with moderate renal dysfunction are at risk of peri-procedural bleeding events and supports the use of pre-operative calculation of creatinine clearance by the Cockcroft and Gault formula to identify patients at increased bleeding risk.<sup>22</sup> Lastly, the bleeding risk of the procedure and co-medication with antiplatelet therapy should also be considered during this pre-procedural assessment. Interestingly, duration of DOAC discontinuation and procedure-associated high-bleeding risk were both strongly associated with peri-procedural bleeding complications in univariate analysis, but since these co-variables are dependent, only bleeding risk remained an independent predictor of bleeding complications after multivariable analysis. Of note, our study was not

designed to assess the relationship between pre-procedural DOAC concentrations and bleeding events. Since a large proportion (88%) of patients had a pre-procedural DOAC concentration  $<50$  ng/mL, no conclusion related to this issue can be drawn from our results.

While measuring DOAC concentration in elective surgery is not necessary, assessment of the anticoagulant effect may be required for patients requiring emergent procedures with a high-bleeding risk.<sup>9</sup> It has been proposed that patients may safely proceed to surgery if DOAC concentration is  $\leq 30$  ng/mL.<sup>9,10</sup> Above this threshold, if the procedure cannot be delayed to allow for DOAC clearance, reversal could be discussed, including idarucizumab for dabigatran, and prothrombin complex concentrates, although their efficacy and safety have been poorly assessed.<sup>9</sup> The wide range of DOAC concentrations observed in our study after a 0 to 48-h discontinuation, from  $<30$  ng/mL to higher than up to 200 ng/mL, confirmed the need for an individual assessment of the anticoagulant effect. Since DOAC concentration measurement is not available in all centres, it has been proposed that routine haemostasis assays could be useful. Since normal PT or normal aPTT alone do not exclude the presence of clinically relevant concentrations of DOACs, it has been suggested that the combination of a normal PT and a normal aPTT indicates with relative reliability a DOAC concentration  $\leq 30$  ng/mL.<sup>10</sup> Nevertheless, this combination had poor performance when DOACs were interrupted in fewer than 48 h as in the case of emergency procedures. It is also ineffective for apixaban, which has little effect on the PT or aPTT.<sup>23</sup> Therefore, the combination of a normal PT and a normal aPTT could not accurately predict a DOAC concentration  $\leq 30$  ng/mL when DOACs are briefly interrupted. It should therefore not be used to guide the decision process in an emergency situation.

Finally, normal TT for dabigatran and LMWH anti-Xa activity  $\leq 0.1$  IU/mL for apixaban and rivaroxaban are highly reliable to exclude residual DOAC concentration. Nevertheless, more than half of the TT and LMWH anti-Xa activity increased even though concentrations were  $\leq 30$  ng/mL, confirming that they are too sensitive to the presence of DOACs and limit their use in the emergency setting. As for the combination of PT and aPTT, the poor NPV of normal TT and LMWH anti-Xa activity  $\leq 0.1$  IU/mL, i.e. increased TT and LMWH anti-Xa activity values despite concentrations  $\leq 30$  ng/mL, is an important limit, resulting potentially in incorrect peri-procedural management, including detrimental delay of a procedure or inadequate reversal. In the end, the measurement of DOAC plasma concentration appears to be the most accurate way to assess the residual anticoagulant effect and to manage emergency procedures.

There are several limitations to our study. First, pre-procedural DOAC management was not standardized and the duration of DOAC discontinuation was not predefined. However, our aim was not to evaluate a standardized DOAC-specific protocol as in other studies,<sup>22,24</sup> but to focus on the predictive factors of pre-procedural DOAC concentrations, which requires various types of DOAC management and different durations of DOAC discontinuation. Here, we reported the first available results regarding pre-procedural DOAC concentrations according to the exact duration of DOAC discontinuation and our findings provide relevant information to practicing clinicians.

Secondly, we used 30 ng/mL as a safety haemostatic threshold although this threshold has never been clinically validated. However, our study was not designed to assess the validity of this cut-off value. Above all, this threshold is increasingly proposed by experts and

international societies.<sup>9,10,15</sup> Thirdly, bridging was widely used in our cohort since it was performed before 33% of the procedures, mainly in patients who interrupted DOAC for more than 72 h. This is in agreement with the findings from the prospective Dresden DOAC registry where bridging was performed for one in three patients.<sup>25</sup> Similarly more than one-fourth of American physicians involved in peri-procedural DOAC management indicated in a recent survey that a CHADS<sub>2</sub> score of two leads to prescribe bridging.<sup>26</sup> Bridging used to be recommended<sup>6,27</sup> until recent data revealed that bridging increased the risk of major bleeding with comparable rates of thromboembolism compared with no bridging.<sup>27–29</sup> In our study, pre-procedural bridging was not associated with an increased incidence of bleeding events compared with the 'no-bridging' approach, but our study was not designed to address this issue. Finally, multivariable analysis showed that pre-procedural bridging was statistically associated with a higher proportion of concentrations  $>30$  ng/mL. This result was unexpected: since bridging is considered only in case of long duration of discontinuation, it was very unlikely that residual concentrations would be  $>30$  ng/mL. We confirmed the negative interaction between duration of DOAC discontinuation and pre-procedural bridging using the Breslow Day test ( $P=0.0093$ ). The slight increase in DOAC concentration only observed in nine apixaban- or rivaroxaban-treated patients could be due to interferences of residual concentrations of LMWH with the DOAC dosage.<sup>30</sup> Additional research is needed to better assess this interaction.

In conclusion, our data provide the proof of concept for a pharmacokinetic strategy for peri-procedural DOAC management, based on DOAC elimination half-life, patient renal function and estimated procedure-associated bleeding risk. The main clinical implication of this study is that a last DOAC intakes 3 days before an elective high-bleeding risk procedure would ensure a minimal pre-procedural concentration for almost all patients, with no need for laboratory testing. Since moderate renal impairment, especially in dabigatran-treated patients, and antiarrhythmic treatment in apixaban- and rivaroxaban-treated patients were independent predictors for higher residual DOAC concentrations, a longer DOAC interruption should be considered in pre-procedural management of such patients. These data require confirmation in larger, prospective studies because of the implications of discontinuing DOAC too early (increased thrombosis risk) or too late (increased bleeding risk). The ongoing PAUSE trial (NCT02228798) is one such study that plans to assess the safety of standardized peri-operative DOAC management protocols according to clinical endpoints. In situations where pre-procedural coagulation testing is needed, including emergency procedures with a high-bleeding risk, routine haemostasis assays have had poor performances and the measurement of DOAC concentration is the only option to assess the residual anticoagulant effect.

## Supplementary material

Supplementary material is available at *European Heart Journal* online.

## Acknowledgements

We would like to thank Sarah Lessire, Laurence Salomon, Sylvie Schlumberger, Phoebe Machin, and Peter Tucker for their contribution to this research project.



## Funding

This study was supported by a research grant from the French Society of Cardiology (Bourse de recherche en cardiologie JESFC 2016 de la Société Française de Cardiologie dotée par Boehringer-Ingelheim France) and by funds from Conny Maeva Charitable Foundation.

**Conflict of interest:** A.G. reports research grants from Conny Maeva Charitable Foundation and from the French Society of Cardiology (Bourse de recherche en cardiologie JESFC 2016 de la Société Française de Cardiologie dotée par Boehringer-Ingelheim France) during the conduct of the study; personal fees and non-financial support from Bayer Healthcare, BMS/Pfizer, and Boehringer-Ingelheim. A.-C.M. reports non-financial support from Bayer Healthcare, BMS/Pfizer and, Boehringer-Ingelheim. M.A. reports non-financial support from Bayer Healthcare. I.G.-T. reports personal fees from Bayer Healthcare, BMS/Pfizer, and Boehringer-Ingelheim. No conflict of interest for the other authors.

## References

- Kirchhof P, Benussi S, Kotecha D, Ahlsson A, Atar D, Casadei B, Castella M, Diener H-C, Heidbuchel H, Hendriks J, Hindricks G, Manolis AS, Oldgren J, Popescu BA, Schotten U, Van Putte B, Vardas P, Agewall S, Camm J, Baron Esquivias G, Budts W, Caceris S, Casselman F, Coca A, De Caterina R, Deftereos S, Dobrev D, Ferro JM, Filippatos G, Fitzsimons D, Gorenek B, Guenoun M, Hohnloser SH, Kolh P, Lip GY, Manolis A, McMurray J, Ponikowski P, Rosenhek R, Ruschitzka F, Savelieva I, Sharma S, Suwalski P, Tamargo JL, Taylor CJ, Van Gelder IC, Voors AA, Windecker S, Zamorano JL, Zeppenfeld K. 2016 ESC Guidelines for the management of atrial fibrillation developed in collaboration with EACTS. *Eur Heart J* 2016;**37**:2893–2962.
- Healey JS, Eikelboom J, Douketis J, Wallentin L, Oldgren J, Yang S, Themeles E, Heidbuchel H, Heidbuchle H, Avezum A, Reilly P, Connolly SJ, Yusuf S, Ezekowitz M; RE-LY Investigators. Periprocedural bleeding and thromboembolic events with dabigatran compared with warfarin: results from the Randomized Evaluation of Long-Term Anticoagulation Therapy (RE-LY) randomized trial. *Circulation* 2012;**126**:343–348.
- Sherwood MW, Douketis JD, Patel MR, Piccini JP, Hellkamp AS, Lokhnygina Y, Spyropoulos AC, Hankey GJ, Singer DE, Nessel CC, Mahaffey KW, Fox KAA, Califf RM, Becker RC; ROCKET AF Investigators. Outcomes of temporary interruption of rivaroxaban compared with warfarin in patients with nonvalvular atrial fibrillation: results from the rivaroxaban once daily, oral, direct factor Xa inhibition compared with vitamin K antagonism for prevention of stroke and embolism trial in atrial fibrillation (ROCKET AF). *Circulation* 2014;**129**:1850–1859.
- Heidbuchel H, Verhamme P, Alings M, Antz M, Diener H-C, Hacke W, Oldgren J, Sinnaeve P, Camm AJ, Kirchhof P; Advisors. Updated European Heart Rhythm Association practical guide on the use of non-vitamin-K antagonist anticoagulants in patients with non-valvular atrial fibrillation: Executive summary. *Eur Heart J* 2016;ehw058.
- Spyropoulos AC, Al-Badri A, Sherwood MW, Douketis JD. Periprocedural management of patients receiving a vitamin K antagonist or a direct oral anticoagulant requiring an elective procedure or surgery. *J Thromb Haemost* 2016;**14**:875–885.
- Sié P, Samama CM, Godier A, Rosencher N, Steib A, Llau JV, Van der Linden P, Pernod G, Lecompte T, Gouin-Thibault I, Albaladejo P. Surgery and invasive procedures in patients on long-term treatment with direct oral anticoagulants: thrombin or factor-Xa inhibitors. Recommendations of the Working Group on perioperative haemostasis and the French Study Group on thrombosis and haemostasis. *Arch Cardiovasc Dis* 2011;**104**:669–676.
- Gallego P, Apostolakis S, Lip GYH. Bridging evidence-based practice and practice-based evidence in periprocedural anticoagulation. *Circulation* 2012;**126**:1573–1576.
- Godier A, Martin A-C, Leblanc I, Mazoyer E, Horellou M-H, Ibrahim F, Flaujac C, Golmard J-L, Rosencher N, Gouin-Thibault I. Peri-procedural management of dabigatran and rivaroxaban: duration of anticoagulant discontinuation and drug concentrations. *Thromb Res* 2015;**136**:763–768.
- Levy JH, Ageno W, Chan NC, Crowther M, Verhamme P, Weitz JI; Subcommittee on Control of Anticoagulation. When and how to use antidotes for the reversal of direct oral anticoagulants: guidance from the SSC of the ISTH. *J Thromb Haemost* 2016;**14**:623–627.
- Pernod G, Albaladejo P, Godier A, Samama CM, Susen S, Gruel Y, Blais N, Fontana P, Cohen A, Llau JV, Rosencher N, Schved JF, de Maistre E, Samama MM, Mismetti P, Sié P; Working Group on Perioperative Haemostasis. Management of major bleeding complications and emergency surgery in patients on long-term treatment with direct oral anticoagulants, thrombin or factor-Xa inhibitors: proposals of the working group on perioperative haemostasis (GIHP) - March 2013. *Arch Cardiovasc Dis* 2013;**106**:382–393.
- Steiner T, Böhm M, Dichgans M, Diener HC, Ell C, Endres M, Eppe C, Grond M, Laufs U, Nickenig G, Riess H, Röther J, Schellinger PD, Spannagl M, Veltkamp R. Recommendations for the emergency management of complications associated with the new direct oral anticoagulants (DOACs), apixaban, dabigatran and rivaroxaban. *Clin Res Cardiol* 2013;**102**:399–412.
- Seiffge DJ, Hooff R-J, Nolte CH, Béjot Y, Turc G, Ikenberg B, Berge E, Persike M, Dequatre-Ponchelle N, Strbian D, Pfeilschifter W, Zini A, Tveiten A, Naess H, Michel P, Sztajzel R, Luft A, Gensicke H, Traenka C, Hert L, Scheitz JF, De Marchis GM, Bonati LH, Peters N, Charidimou A, Werring DJ, Palm F, Reinhard M, Niesen W-D, Nagao T, Pezzini A, Caso V, Nederkoorn PJ, Kägi G, von Hessler A, Padjen V, Cordonnier C, Erdur H, Lyrer PA, Brouns R, Steiner T, Tatlisumak T, Engelter ST; NOACISP Study Group. Recanalization therapies in acute ischemic stroke patients: impact of prior treatment with novel oral anticoagulants on bleeding complications and outcome. *Circulation* 2015;**132**:1261–1269.
- García D, Alexander JH, Wallentin L, Wojdyla DM, Thomas L, Hanna M, Al-Khatib SM, Dorian P, Ansell J, Commerford P, Flaker G, Lanus F, Vinereanu D, Xavier D, Hylek EM, Held C, Verheugt FWA, Granger CB, Lopes RD. Management and clinical outcomes in patients treated with apixaban vs warfarin undergoing procedures. *Blood* 2014;**124**:3692–3698.
- Summary of Product Characteristics; EMA. [http://www.ema.europa.eu/docs/en\\_GB/document\\_library/EPAR\\_-\\_Product\\_Information/human/000829/WC500041059.pdf](http://www.ema.europa.eu/docs/en_GB/document_library/EPAR_-_Product_Information/human/000829/WC500041059.pdf) (7 July 2017).
- Garaoni D, Levy JH, Albaladejo P, Samama CM; Groupe d'intérêt en Hémostase Périopératoire. Updates in the perioperative and emergency management of non-vitamin K antagonist oral anticoagulants. *Crit Care* 2015;**19**:203.
- Levy JH, Spyropoulos AC, Samama CM, Douketis J. Direct oral anticoagulants: new drugs and new concepts. *JACC Cardiovasc Interv* 2014;**7**:1333–1351.
- Steinberg BA, Hellkamp AS, Lokhnygina Y, Halperin JL, Breithardt G, Passman R, Hankey GJ, Patel MR, Becker RC, Singer DE, Hacke W, Berkowitz SD, Nessel CC, Mahaffey KW, Fox KAA, Califf RM, Piccini JP; ROCKET AF Steering Committee and Investigators. Use and outcomes of antiarrhythmic therapy in patients with atrial fibrillation receiving oral anticoagulation: results from the ROCKET AF trial. *Heart Rhythm* 2014;**11**:925–932.
- Monreal M, Falga C, Valle R, Barba R, Bosco J, Beato JL, Maestre A; RIETE INVESTIGATORS. Venous thromboembolism in patients with renal insufficiency: findings from the RIETE Registry. *Am J Med* 2006;**119**:1073–1079.
- Kahn SR, Lim W, Dunn AS, Cushman M, Dentali F, Akl EA, Cook DJ, Balekian AA, Klein RC, Le H, Schulman S, Murad MH; American College of Chest Physicians. Prevention of VTE in nonsurgical patients: antithrombotic therapy and prevention of thrombosis, 9th ed: American College of Chest Physicians Evidence-Based Clinical Practice Guidelines. *Chest* 2012;**141**:e195S–e226S.
- Falck-Ytter Y, Francis CW, Johanson NA, Curley C, Dahl OE, Schulman S, Ortel TL, Pauker SG, Colwell CW; American College of Chest Physicians. Prevention of VTE in orthopedic surgery patients: antithrombotic therapy and prevention of thrombosis, 9th ed: American College of Chest Physicians Evidence-Based Clinical Practice Guidelines. *Chest* 2012;**141**(2 Suppl):e278S–e325S.
- Lejus C, Desdoits A, Lambert C, Langlois C, Roquilly A, Gouin F, Asehnoune K. Preoperative moderate renal impairment is an independent risk factor of transfusion in elderly patients undergoing hip fracture surgery and receiving low-molecular-weight heparin for thromboprophylaxis. *J Clin Anesth* 2012;**24**:378–384.
- Douketis JD, Wang G, Chan N, Eikelboom JW, Syed S, Barty R, Moffat KA, Spencer FA, Blostein M, Schulman S. Effect of standardized perioperative dabigatran interruption on the residual anticoagulation effect at the time of surgery or procedure. *J Thromb Haemost* 2016;**14**:89–97.
- Gouin-Thibault I, Flaujac C, Delavenne X, Quenet S, Horellou M-H, Laporte S, Siguret V, Lecompte T. Assessment of apixaban plasma levels by laboratory tests: suitability of three anti-Xa assays. A multicentre French GEHT study. *Thromb Haemost* 2014;**111**:240–248.
- Schulman S, Carrier M, Lee AYY, Shivakumar S, Blostein M, Spencer FA, Solymoss S, Barty R, Wang G, Heddle N, Douketis JD. Perioperative management of dabigatran: a prospective cohort study. *Circulation* 2015;**132**:167–173.
- Beyer-Westendorf J, Gelbricht V, Förster K, Ebertz F, Köhler C, Werth S, Kuhlisch E, Stange T, Thieme C, Daschkow K, Weiss N. Peri-interventional management of novel oral anticoagulants in daily care: results from the prospective Dresden NOAC registry. *Eur Heart J* 2014;**35**:1888–1896.
- Flaker GC, Theriot P, Binder LG, Dobesh PP, Cuker A, Doherty JU. Management of periprocedural anticoagulation: a survey of contemporary practice. *J Am Coll Cardiol* 2016;**68**:217–226.
- Kozek-Langenecker SA, Afshari A, Albaladejo P, Santullano CAA, De Robertis E, Filipescu DC, Fries D, Görlinger K, Haas T, Imberger G, Jacob M, Lancé M, Llau J,

- Mallett S, Meier J, Rahe-Meyer N, Samama CM, Smith A, Solomon C, Van der Linden P, Wikkelsø AJ, Wouters P, Wyffels P. Management of severe perioperative bleeding. *Eur J Anaesthesiol* 2013;**30**:270–382.
28. Douketis JD, Spyropoulos AC, Kaatz S, Becker RC, Caprini JA, Dunn AS, Garcia DA, Jacobson A, Jaffer AK, Kong DF, Schulman S, Turpie AGG, Hasselblad V, Ortel TL; BRIDGE Investigators. Perioperative bridging anticoagulation in patients with atrial fibrillation. *N Engl J Med* 2015;**373**:823–833.
29. Douketis JD, Healey JS, Brueckmann M, Eikelboom JW, Ezekowitz MD, Fraessdorf M, Noack H, Oldgren J, Reilly P, Spyropoulos AC, Wallentin L, Connolly SJ. Perioperative bridging anticoagulation during dabigatran or warfarin interruption among patients who had an elective surgery or procedure. *Thromb Haemost* 2015;**113**:625–632.
30. Lessire S, Douxfils J, Pochet L, Dincq AS, Larock AS, Gourdin M, Dogné JM, Chatelain B, Mullier F. Estimation of rivaroxaban plasma concentrations in the perioperative setting in patients with or without heparin bridging. *Clin Appl Thromb Hemost* 2016.
